# Supplementary material for: Aggregation of metallo-supramolecular architectures by metallo-assembled hydrogen bonding sitesElectronic supplementary information (ESI) available: Electronic Supplementary Information (ESI) available: full experimental details; characterisation data; crystallographic information; additional views and discussion of the solid state structures. See http://www.rsc.org/suppdata/cc/b3/b308963k/
Source: Royal Society of Chemistry journal article supplement (doi:10.1039/b308963k), 2003-01-01
Supplement: b308963k.doc [file b308963k.doc]

# Supplementary Information

# Controlled aggregation of metallo-supramolecular architectures by metallo-assembled hydrogen bonding sites

Arnaud Lavalette, Floriana Tuna, Guy Clarkson, Nathaniel W. Alcock and Michael J. Hannon.*

*Centre for Supramolecular and Macromolecular Chemistry, Department of Chemistry, University of Warwick, Gibbet Hill Road, Coventry, CV4 7AL, UK.*

*Email M.J.Hannon@warwick.ac.uk. fax + 44 2476 524112*

#### **Materials**

#### All starting materials were purchased from Aldrich and BDH, the compounds were used without further purification.

#### **Measurements**

#### NMR spectra were recorded on Bruker DPX 300 and ACP 400 instruments using standard Bruker software. FAB mass spectra were recorded by the Warwick mass spectrometry service on a Micromass Autospec spectrometer using 3-nitrobenzyl alcohol as matrix. Microanalyses were conducted on a Leeman Labs CE44 CHN analyser by the University of Warwick Analytical service. X-ray crystallography data were measured on a Siemens SMART three-circle system with CCD area detector using the Oxford Cryosystems Cryostream Cooler. Infrared spectra were recorded on a Bruker Vector 220 instrument fitted with an ATR Golden Gate.

#### **Syntheses**

#### **6-Hydroxymethylpyridine-2-carboxaldehyde**

#### 2,6-Pyridinedimethanol (2 g, 0.014 mol) in isopropanol (70 cm3) was heated to gentle reflux. Then activated manganese (IV) oxide (< 5 micron) (1.25 g, 0.014 mol) was added portion wise over 1 hour. Gentle reflux was continued for 6 hours. After this time the black solution was filtered hot through Celite and the residue washed with hot isopropanol (30 cm3). The solvent was removed in vacuo to yield a pale yellow solid. The solid was subjected to flash chromatography on silica gel 60, loaded in DCM and eluted with 5% methanol: DCM. Fractions with Rf=0.55 (TLC run with 5% methanol: DCM) were collected to yield a yellow oil which crystallised in the fridge to a pale yellow solid. The product was dried under high vacuum over P2O5 to constant weight (0.64g, 33%)

#### Microanalysis: found C, 60.9; H, 5.3; N, 10.1. Calculated from C7H7NO2: C, 61.3; H, 5.1; N, 10.2%

#### Positive ion Fast Atom Bombardment (FAB): m/z 137 (M+), 120 (M+-OH)

#### 1H NMR (CDCl3, 400 MHz, 298K):  10.06 (1H, s, CHO), 7.89 (2H, 2d, J=7.5 Hz, H4+H5), 7.52 (1H, t, J=7.3 Hz, H4), 4.88 (2H, s, CH2), 3.81 (H, br s, OH) ppm 13C NMR (CDCl3, 400 MHz, 298K):  192.9 (Cald.), 148.0 (C2), 138.1 (C4), 136.5 (C3), 128.4 (C5), 64.9 (C6), 53.4 (CH2) ppm

#### **L1 (C27H24N4O2)**

#### 6-Hydroxymethylpyridine-2-carboxaldehyde (0.137 g, 1.0 mmol) in ethanol (25 cm3) was added dropwise to an ethanolic solution of 4,4’ methylene dianiline (0.099 g in 25 ml, 0.5 mmol) over 30 min. The resulting yellow solution was left stirred at room temperature for 24 hours. A pale cream solid precipitated and was collected by vacuum filtration. The product was dried under vacuum over P2O5 to constant weight (0.156 g, 72 %)

#### Positive ion EI : m/z 435 (M+, 95%), 418 (M+-OH, 15%), 401 (M+-2 OH, 20%), 404 (M+- CH2OH, 15%)

#### 1H NMR (CDCl3, 400 MHz, 298K):  8.73 (1H, s, Him), 8.19 (1H, d, J=7.8 Hz, H3), 7.85 (1H, t, J=7.8 Hz, H4), 7.33 (1H, d, J=7.8 Hz, H5), 7.26 (4H, s, Hph), 4.83 (2H, s, CH2OH), 4.06 (1H, s, CH2spacer) 3.80 (1H, br s, OH) ppm

#### **Cu2L12(PF6)2**

#### To a stirred solution of **L1** (0.043 g, 0.1 mmol) in dry methanol (5 cm3) was added [Cu(MeCN)4][PF6] (0.037 g, 0.1 mmol) dissolved also in dry methanol (5 ml) under nitrogen. The red–brown solution was stirred at room temperature under nitrogen for 16 hours. The red-brown solid was subsequently filtered under vacuum and washed with diethyl ether (1 cm3). The product was dried under vacuum over P2O5 to constant weight. (0.045 g, 70%)

#### Positive-ion FAB: m/z 1143 (Cu2(L1)2(PF6)+), 1000 (Cu2(L1)2+

#### 1H NMR (CD3CN, 400 MHz, 298K) :  9.24 (1H, s, Hi), 8.25 (1H, t, J=7.8 Hz, H4), 8.02 (1H, d, J=7.9 Hz, H3), 7.91 (1H, d, J=7.9 Hz, H5), 7.36 (2H, d, J=8.0 Hz, Hph), 7.18 (2H, d, J=8.2 Hz, Hph), 4.32 (2H, bd, CH2OH), 3.87 (1H, s, CH2spacer), 3.47 (1H, bs, OH) ppm

#### 1H NMR (CD3CN, 500 MHz, 233K) :  9.37 (2H, s, Hi box) 9.30 (7H, s, Hi hel), 8.23 (9H, m, H4 box, H4 hel), 8.00 (9H, d, J=7.8 Hz, H3 hel,, H3 box), 7.88 (7H, d, J=7.8 Hz, H5 hel), 7.84 (2H, d, J=7.8 Hz, H5 box), 7.43 (4H, d, J=8.2 Hz, HPh box), 7.33 (14H, d, J=8.2 Hz, HPh hel) 7.23 (4H, d, J=8.2 Hz, HPh box), 7.16 (14H, d, J=8.2 Hz, HPh hel), 4.29 (7H, dd, J=15.9, 6.2 Hz, CH2OH hel), 4.22 (2H, dd, J=15.9, 5.6 Hz, CH2OH box), 4.11 (7H, dd, J=16.2, 6.2 Hz, CH2OH hel), 4.07 (2H, dd, J=16.2, 6.2 Hz, CH2OH box), 3.90 (1H, d, J= 12.8 Hz CH2spacer box), 3.81 (8H, s, CH2spacer hel, CH2spacer box) 3.75 (9H, m, OH hel, OH box) ppm.

#### max/nm (MeCN) 510 (/mol-1dm-3cm-1 2.6x104) MLCT

max/cm-1 3500-3000w, 2357m, 1596m, 1501m, 1463m, 1269m, 1200m, 1161, 1079m, 1012m, 910m, 828s, 789m, 737m, 648m, 612m, 603m.

#### **Cu2L22(PF6)2**

6-Hydroxymethylpyridine-2-carboxaldehyde (0.137 g, 1.0 mmol) was dissolved in dry methanol (15 ml) with 4,4’ methylene bis 2,6 diethyl aniline (0.155 g, 0.5 mmol). The pale yellow solution was left stirring at room temperature under nitrogen for 30 min. Then [Cu(MeCN)4][PF6](0.018 g, 0.5 mmol) dissolved in dry methanol (5 ml) was added to the solution under a blanket of nitrogen. The solution, which quickly becomes red–brown in colour, was stirred at room temperature under nitrogen for 15 hours. The red-brown solid which precipitated was filtered off under vacuum and washed with diethyl ether (2 cm3). The product was dried under vacuum over P2O5 to constant weight. (0.27 g, 36%)

Positive-ion FAB: m/z 1369 (Cu2(L2)2(PF6)+), 1224 (Cu2(L2)2+)

#### 1H NMR (CD2Cl2, 400 MHz, 298K):  8.50 (1H, s, Him), 8.26 (1H, t, J=7.8 Hz, H4), 8.12 (1H, d, J=7.8 Hz, H3), 7.89 (1H, d, J=7.8 Hz, H5), 7.14 (1H, s, HPh), 6.58 (1H, s, HPh), 4.35 (1H, dd, J=14.1, 4.1 Hz CH2OH), 3.95 (1H, br d, J=13.8 Hz CH2OH), 3.92 (1H, s, CH2spacer), 3.07 (1H, br s, OH) 2.59 (2H, m, CH2Me), 1.91 (2H, m, CH2Me), 1.03 (3H, t, J=7.4 Hz, Me), 0.64 (3H, t, J=7.3 Hz, Me) ppm.

#### max/nm (MeCN) 466 (/mol-1dm-3cm-1 3x104) MLCT

max/cm-1 3500-3000w, 2962m, 1615m, 1583m, 1461m, 1428m, 1399m, 1339m, 1316m, 1194m, 1140m, 1083m, 1003m, 979m, 920m, 880m, 844s, 789m, 735m, 648m, 607m

The chloride salt Cu2L22Cl2was prepared in an analogous manner from copper(I) chloride

###### Crystallographic Supplementary Information

#### Crystallographic data were collected with a Siemens SMART three-circle system with CCD area detector. The crystals were held at 180(2) K with an Oxford Cryosystem Cryostream Cooler. Refinements used SHELX 97 (G.M. Sheldrick, **1997**).

#### Crystal Structure data for **Cu2L12(PF6)2** C62H60N12O4P2F12Cu2, Mr= 1454.24, triclinic, space group P-1, a = 8.633(2), b = 14.567(4), c = 14.634(4) Å,  = 80.887(6),  = 75.750(7),  = 77.550(5)°, V=1730 Å3, T=180(2) K, =0.71073 Å, Z=1, calcd=1.395 Mg m-3, F(000)=744, (MoK)=0.746mm-1. Crystal character: purple block. Crystal dimensions = 0.22 x 0.05 x 0.04 mm. max=22.50°. A total of 7169 reflections measured, 4469 unique [R(int) = 0.0882]. Absorption correction by semi-empirical from equivalents. Weighting scheme w=1/[2(F02)+ (0.0715P)2], where P=( F02+2Fc2)/3. Goodness-of-fit on F2 was 0.935, R1 [for all reflections with I>2(I)]=0.0712, wR2=0.1801. Data/ restraints/ parameters 4469/ 1/ 434. Largest difference Fourier peak and hole 0.504 and -0.413 eÅ3. Additional views showing inclusion of acetonitrile guest in the box cavities and illustrating inter-chain -stacking and H-bonding interactions are included herein.

#### Crystal Structure data for **Cu2L22(PF6)2** C76H94N10O6P2F12Cu2, Mr= 1660.63, monoclinic, space group P2(1)/n, a = 12.3955(14), b = 15.0429(18), c = 41.729(5) Å,  = 90,  = 97.315(3),  = 90°, V=7717.6(15) Å3, T=180(2) K, =0.71073 Å, Z=4, calcd=1.429 Mg m-3, F(000)=3456, (MoK)=0.680 mm-1. Crystal character: purple block. Crystal dimensions = 0.24 x 0.24 x 0.12 mm. max=24.00°. A total of 35334 reflections measured, 12082 unique [R(int) = 0.1508]. Absorption correction by semi-empirical from equivalents. Weighting scheme w=1/[2(F02)+ (0.0373P)2], where P=( F02+2Fc2)/3. Goodness-of-fit on F2 was 0.996, R1 [for 5951 reflections with I>2(I)]= 0.0734, wR2 = 0.1383. Data/ restraints/ parameters 12082/ 0/ 1009. Largest difference Fourier peak 0.439 and -0.382 eÅ3.

#### Crystal Structure data for **Cu2L22Cl2**C76H86N8O4Cl2Cu2, Mr= 1373.51, triclinic, space group P-1, a = 15.355(5), b = 16.454(5), c = 16.555(5) Å,  = 115.860(7),  = 95.746(9),  = 110.080(7)°, V=3377.0(19) Å3, T=180(2) K, =0.71073 Å, Z=2, calcd=1.351 Mg m-3, F(000)=1444, (MoK)=0.766mm-1. Crystal character: orange plate. Crystal dimensions = 0.46 x 0.18 x 0.01 mm. max=22.50°. A total of 13613 reflections measured, 8575 unique [R(int) = 0.1500]. Absorption correction by semi-empirical from equivalents. Weighting scheme w=1/[2(F02)+ (0.1969P)2], where P=( F02+2Fc2)/3. Goodness-of-fit on F2 was 0.932, R1 [for all reflections with I>2(I)]= 0.1391, wR2 = 0.4035. Data/ restraints/ parameters 8575/ 13/ 470. Largest difference Fourier peak and hole 1.151 and -1.752 eÅ3. Due to weak diffraction and poor quality thin crystals several restraints and constraints were required during the refinement, but despite the rather high R factor the structure is good enough to obtain the orientation of the ligands and the interaction between the supramolecular complexes.Additional views showing inclusion of benzene solvent between the helices within a chain and illustrating inter-chain H-bonding interactions are included herein.

**Structure 1 Cu2L12(PF6)2:**

View showing incorporation of acetonitrile solvent molecules within the box structure

View showing the inter-chain -stacking and H-bonding interactions.

**Structure 3: Cu2L22Cl2**

View showing the incorporation of benzene solvent between the helices within a chain

View showing the inter-chain interactions of the hydroxy groups with the imino protons.
